# Supplementary material for: Global Gene Expression Analysis of the Zoonotic Parasite Trichinella spiralis Revealed Novel Genes in Host Parasite Interaction
Source: PLoS Negl Trop Dis. 2012 Aug 28;6(8):e1794. doi: 10.1371/journal.pntd.0001794 (PMC3429391; doi:10.1371/journal.pntd.0001794)
Supplement: File S6 — The DNase II family genes differentially expressed in each library. (XLS) [file pntd.0001794.s006.xls]

## Sheet: Ad vs. ML
Supplementary file 4. The differentially expressed DNaseⅡfamily genes in each library.											Supplementary file 6: The DNaseⅡfamily genes differentially expressed in each library.
Gene	RawIntensity-TS-Ad	RawIntensity-TS-ML	TPM-TS-Ad	TPM-TS-ML	log2 Ratio(TS-ML/TS-Ad)	P-Value	FDR	GO Component	GO Function	GO Process	blast nr
Tsp_00874	0	97	0.01	19.1	10.8994	0	0	-	-	-	gi|162535|gb|AAA30327.1|/7.66704e-133/43 kD secreted glycoprotein [Trichinella spiralis]
Tsp_09051	0	19	0.01	3.74	8.54689	2.21014e-06	1.09127e-05	-	-	-	gi|60544817|gb|AAX22751.1|/5.58658e-15/newborn larvae-specific DNase II-11 [Trichinella spiralis]
Tsp_00875	37	159	7.4	31.31	2.08103	1.66311e-13	1.83428e-12	-	-	-	gi|117581955|gb|ABK41422.1|/2.77158e-51/DNase II [Trichinella spiralis]
Tsp_09050	35	11	7	2.17	-1.68966	0.000285654	0.000943658	-	-	-	gi|60544819|gb|AAX22752.1|/5.42359e-14/newborn larvae-specific DNase II-12 [Trichinella spiralis]
Tsp_09049	114	16	22.79	3.15	-2.85498	5.63026e-20	8.75642e-19	-	-	-	gi|60544817|gb|AAX22751.1|/8.96595e-15/newborn larvae-specific DNase II-11 [Trichinella spiralis]
Tsp_12138	27	3	5.4	0.59	-3.19417	3.85516e-06	1.84324e-05	-	-	-	gi|60544811|gb|AAX22748.1|/1.97879e-150/newborn larvae-specific DNase II-8 [Trichinella spiralis]
Tsp_06581	1475	37	294.82	7.29	-5.33777	0	0	-	-	-	gi|63095175|gb|AAY32318.1|/1.85246e-172/adult-specific DNase II-3 [Trichinella spiralis]
Tsp_06568	6484	150	1296	29.54	-5.45525	0	0	-	-	-	gi|63095189|gb|AAY32325.1|/4.52743e-170/adult-specific DNase II-10 [Trichinella spiralis]
Tsp_09863	658	4	131.52	0.79	-7.37921	3.2459e-192	1.38955e-190	-	-	-	gi|63095183|gb|AAY32322.1|/1.44041e-10/adult-specific DNase II-7 [Trichinella spiralis]
Tsp_02302	1334	7	266.63	1.38	-7.59403	0	0	-	-	-	gi|63095179|gb|AAY32320.1|/7.62429e-175/adult-specific DNase II-5 [Trichinella spiralis]
Tsp_07561	17	0	3.4	0.01	-8.40939	6.67532e-06	3.04607e-05	-	-	-	gi|63095183|gb|AAY32322.1|/8.65864e-168/adult-specific DNase II-7 [Trichinella spiralis]
Tsp_12517	18	0	3.6	0.01	-8.49185	3.31298e-06	1.59874e-05	-	-	-	gi|63095177|gb|AAY32319.1|/1.47273e-15/adult-specific DNase II-4 [Trichinella spiralis]
Tsp_09862	36	0	7.2	0.01	-9.49185	1.10576e-11	9.3612e-11	-	-	-	gi|63095177|gb|AAY32319.1|/2.01212e-14/adult-specific DNase II-4 [Trichinella spiralis]
Tsp_06569	40	0	8	0.01	-9.64386	6.70884e-13	6.48625e-12	-	-	-	gi|63095171|gb|AAY32316.1|/2.82092e-119/adult-specific DNase II-1 [Trichinella spiralis]
Tsp_06558	71	0	14.19	0.01	-10.4707	2.48198e-22	4.06565e-21	-	-	-	gi|63095173|gb|AAY32317.1|/3.29464e-166/adult-specific DNase II-2 [Trichinella spiralis]
Tsp_11476	439	0	87.75	0.01	-13.0992	2.68912e-134	1.01055e-132	-	-	-	gi|60544815|gb|AAX22750.1|/4.74939e-105/newborn larvae-specific DNase II-10 [Trichinella spiralis]

## Sheet: NBL vs. Ad
Gene	RawIntensity-TS-NBL	RawIntensity-TS-Ad	TPM-TS-NBL	TPM-TS-Ad	log2 Ratio(TS-Ad/TS-NBL)	P-Value	FDR	GO Component	GO Function	GO Process	blast nr
Tsp_06558	0	71	0.01	14.19	10.4707	1.11022e-15	9.61718e-15	-	-	-	gi|63095173|gb|AAY32317.1|/3.29464e-166/adult-specific DNase II-2 [Trichinella spiralis]
Tsp_06569	0	40	0.01	8	9.64386	1.7133e-12	9.59643e-12	-	-	-	gi|63095171|gb|AAY32316.1|/2.82092e-119/adult-specific DNase II-1 [Trichinella spiralis]
Tsp_09862	0	36	0.01	7.2	9.49185	2.57572e-11	1.31783e-10	-	-	-	gi|63095177|gb|AAY32319.1|/2.01212e-14/adult-specific DNase II-4 [Trichinella spiralis]
Tsp_12517	0	18	0.01	3.6	8.49185	5.11436e-06	1.61887e-05	-	-	-	gi|63095177|gb|AAY32319.1|/1.47273e-15/adult-specific DNase II-4 [Trichinella spiralis]
Tsp_07561	0	17	0.01	3.4	8.40939	1.00721e-05	3.05975e-05	-	-	-	gi|63095183|gb|AAY32322.1|/8.65864e-168/adult-specific DNase II-7 [Trichinella spiralis]
Tsp_06581	26	1475	5.36	294.82	5.78146	4.62168e-11	2.32787e-10	-	-	-	gi|63095175|gb|AAY32318.1|/1.85246e-172/adult-specific DNase II-3 [Trichinella spiralis]
Tsp_02302	25	1334	5.15	266.63	5.69412	8.86114e-11	4.33107e-10	-	-	-	gi|63095179|gb|AAY32320.1|/7.62429e-175/adult-specific DNase II-5 [Trichinella spiralis]
Tsp_06568	146	6484	30.1	1296	5.42816	8.4155e-14	5.89489e-13	-	-	-	gi|63095189|gb|AAY32325.1|/4.52743e-170/adult-specific DNase II-10 [Trichinella spiralis]
Tsp_09863	25	658	5.15	131.52	4.67457	8.86114e-11	4.33349e-10	-	-	-	gi|63095183|gb|AAY32322.1|/1.44041e-10/adult-specific DNase II-7 [Trichinella spiralis]
Tsp_09050	5	35	1.03	7	2.76471	2.68228e-05	7.55546e-05	-	-	-	gi|60544819|gb|AAX22752.1|/5.42359e-14/newborn larvae-specific DNase II-12 [Trichinella spiralis]
Tsp_00875	6	37	1.24	7.4	2.57719	1.62773e-05	4.79012e-05	-	-	-	gi|117581955|gb|ABK41422.1|/2.77158e-51/DNase II [Trichinella spiralis]
Tsp_09125	43	237	8.87	47.37	2.41697	1.34115e-13	8.92298e-13	-	-	-	gi|60544817|gb|AAX22751.1|/5.97855e-19/newborn larvae-specific DNase II-11 [Trichinella spiralis]
Tsp_12242	59	9	12.17	1.8	-2.75726	1.00192e-10	4.86447e-10	-	-	-	gi|60544813|gb|AAX22749.1|/2.10734e-18/newborn larvae-specific DNase II-9 [Trichinella spiralis]
Tsp_06422	17	2	3.51	0.4	-3.1334	0.000312022	0.000749967	-	-	-	gi|60544817|gb|AAX22751.1|/5.09577e-16/newborn larvae-specific DNase II-11 [Trichinella spiralis]
Tsp_11322	20	2	4.12	0.4	-3.36457	4.88722e-05	0.000132543	-	-	-	gi|60544819|gb|AAX22752.1|/4.04108e-15/newborn larvae-specific DNase II-12 [Trichinella spiralis]
Tsp_07580	37	3	7.63	0.6	-3.66865	6.03576e-09	2.55106e-08	-	-	-	gi|60544819|gb|AAX22752.1|/2.67343e-13/newborn larvae-specific DNase II-12 [Trichinella spiralis]
Tsp_13903	181	14	37.32	2.8	-3.73645	1.35567e-39	2.2087e-38	-	-	-	gi|60544809|gb|AAX22747.1|/4.68663e-08/newborn larvae-specific DNase II-7 [Trichinella spiralis]
Tsp_11878	94	6	19.38	1.2	-4.01346	2.6321e-22	2.91866e-21	-	-	-	gi|60544815|gb|AAX22750.1|/1.01839e-09/newborn larvae-specific DNase II-10 [Trichinella spiralis]
Tsp_12138	2173	27	448.05	5.4	-6.37456	0	0	-	-	-	gi|60544811|gb|AAX22748.1|/1.97879e-150/newborn larvae-specific DNase II-8 [Trichinella spiralis]
Tsp_11502	947	11	195.26	2.2	-6.47175	2.58814e-270	1.28657e-268	-	-	-	gi|13242037|gb|AAK16519.1|AF331159_1/4.86095e-43/newborn larvae-specific protein SS1 [Trichinella spiralis]
Tsp_11476	44120	439	9097.13	87.75	-6.69587	0	0	-	-	-	gi|60544815|gb|AAX22750.1|/4.74939e-105/newborn larvae-specific DNase II-10 [Trichinella spiralis]
Tsp_11499	617	3	127.22	0.6	-7.72815	5.97082e-184	2.47577e-182	-	-	-	gi|60544797|gb|AAX22741.1|/4.25683e-85/newborn larvae-specific DNase II-1 [Trichinella spiralis]
Tsp_11498	11	0	2.27	0.01	-7.82655	0.000404566	0.000950469	-	-	-	gi|60544817|gb|AAX22751.1|/4.69888e-98/newborn larvae-specific DNase II-11 [Trichinella spiralis]
Tsp_08924	14	0	2.89	0.01	-8.17493	4.8248e-05	0.000132078	-	-	-	gi|60544817|gb|AAX22751.1|/1.78794e-16/newborn larvae-specific DNase II-11 [Trichinella spiralis]
Tsp_07569	23	0	4.74	0.01	-8.88874	8.1837e-08	3.13482e-07	-	-	-	gi|60544803|gb|AAX22744.1|/4.41747e-150/newborn larvae-specific DNase II-4 [Trichinella spiralis]
Tsp_12139	1105	2	227.84	0.4	-9.15381	0	0	-	-	-	gi|60544821|gb|AAX22753.1|/3.26902e-122/newborn larvae-specific DNase II-13 [Trichinella spiralis]
Tsp_12382	29	0	5.98	0.01	-9.224	1.16394e-09	5.23024e-09	-	-	-	gi|60544805|gb|AAX22745.1|/3.12823e-18/newborn larvae-specific DNase II-5 [Trichinella spiralis]
Tsp_12134	3623	6	747.03	1.2	-9.28199	0	0	-	-	-	gi|60544815|gb|AAX22750.1|/6.28454e-49/newborn larvae-specific DNase II-10 [Trichinella spiralis]
Tsp_00873	33	0	6.8	0.01	-9.40939	6.83254e-11	3.38302e-10	-	-	-	gi|117581955|gb|ABK41422.1|/2.72741e-52/DNase II [Trichinella spiralis]
Tsp_11494	34	0	7.01	0.01	-9.45327	3.36314e-11	1.70674e-10	-	-	-	gi|60544803|gb|AAX22744.1|/5.82342e-148/newborn larvae-specific DNase II-4 [Trichinella spiralis]
Tsp_11501	40	0	8.25	0.01	-9.68825	4.78328e-13	2.84493e-12	-	-	-	gi|60544807|gb|AAX22746.1|/2.94814e-122/newborn larvae-specific DNase II-6 [Trichinella spiralis]
Tsp_11488	42	0	8.66	0.01	-9.75822	1.15892e-13	7.89055e-13	-	-	GO:0009987//cellular process	gi|60544815|gb|AAX22750.1|/1.4449e-110/newborn larvae-specific DNase II-10 [Trichinella spiralis]
Tsp_07489	44	0	9.07	0.01	-9.82496	2.80788e-14	2.12143e-13	-	-	-	gi|60544805|gb|AAX22745.1|/3.37103e-10/newborn larvae-specific DNase II-5 [Trichinella spiralis]
Tsp_11496	46	0	9.48	0.01	-9.88874	6.80308e-15	5.40601e-14	-	-	-	gi|60544805|gb|AAX22745.1|/3.51955e-147/newborn larvae-specific DNase II-5 [Trichinella spiralis]
Tsp_11495	65	0	13.4	0.01	-10.388	9.63404e-21	1.02168e-19	-	-	-	gi|60544817|gb|AAX22751.1|/1.5644e-102/newborn larvae-specific DNase II-11 [Trichinella spiralis]
Tsp_12135	184	0	37.94	0.01	-11.8895	2.24514e-57	4.88625e-56	-	-	-	gi|60544805|gb|AAX22745.1|/4.93728e-149/newborn larvae-specific DNase II-5 [Trichinella spiralis]
Tsp_11489	190	0	39.18	0.01	-11.9359	3.19316e-59	7.10864e-58	-	-	-	gi|27549463|gb|AAO17050.1|/2.60829e-101/newborn larvae stage-specific DNase II [Trichinella spiralis]
Tsp_12346	396	0	81.65	0.01	-12.9952	1.22988e-122	4.1227e-121	-	-	-	gi|60544819|gb|AAX22752.1|/8.72949e-128/newborn larvae-specific DNase II-12 [Trichinella spiralis]
Tsp_12347	675	0	139.18	0.01	-13.7647	1.59745e-208	7.02314e-207	-	-	-	gi|60544821|gb|AAX22753.1|/1.86941e-54/newborn larvae-specific DNase II-13 [Trichinella spiralis]
Tsp_12136	696	0	143.51	0.01	-13.8089	5.48094e-215	2.45912e-213	-	-	-	gi|60544821|gb|AAX22753.1|/8.55417e-67/newborn larvae-specific DNase II-13 [Trichinella spiralis]

## Sheet: NBL vs. ML
Gene	RawIntensity-TS-NBL	RawIntensity-TS-ML	TPM-TS-NBL	TPM-TS-ML	log2 Ratio(TS-ML/TS-NBL)	P-Value	FDR	GO Component	GO Function	GO Process	blast nr
Tsp_00874	0	97	0.01	19.1	10.8994	0	0	-	-	-	gi|162535|gb|AAA30327.1|/7.66704e-133/43 kD secreted glycoprotein [Trichinella spiralis]
Tsp_00875	6	159	1.24	31.31	4.65821	1.40744e-05	4.93585e-05	-	-	-	gi|117581955|gb|ABK41422.1|/2.77158e-51/DNase II [Trichinella spiralis]
Tsp_09125	43	163	8.87	32.1	1.85557	1.25677e-13	9.97039e-13	-	-	-	gi|60544817|gb|AAX22751.1|/5.97855e-19/newborn larvae-specific DNase II-11 [Trichinella spiralis]
Tsp_09052	25	4	5.15	0.79	-2.70465	3.53678e-05	0.000117086	-	-	-	gi|60544817|gb|AAX22751.1|/1.42608e-15/newborn larvae-specific DNase II-11 [Trichinella spiralis]
Tsp_09863	25	4	5.15	0.79	-2.70465	3.53678e-05	0.000117042	-	-	-	gi|63095183|gb|AAY32322.1|/1.44041e-10/adult-specific DNase II-7 [Trichinella spiralis]
Tsp_09049	153	16	31.55	3.15	-3.32422	6.70222e-31	9.65953e-30	-	-	-	gi|60544817|gb|AAX22751.1|/8.96595e-15/newborn larvae-specific DNase II-11 [Trichinella spiralis]
Tsp_13903	181	12	37.32	2.36	-3.98309	6.84442e-42	1.17719e-40	-	-	-	gi|60544809|gb|AAX22747.1|/4.68663e-08/newborn larvae-specific DNase II-7 [Trichinella spiralis]
Tsp_11878	94	6	19.38	1.18	-4.03771	1.34229e-22	1.60601e-21	-	-	-	gi|60544815|gb|AAX22750.1|/1.01839e-09/newborn larvae-specific DNase II-10 [Trichinella spiralis]
Tsp_07580	37	2	7.63	0.39	-4.29014	6.45404e-10	3.45918e-09	-	-	-	gi|60544819|gb|AAX22752.1|/2.67343e-13/newborn larvae-specific DNase II-12 [Trichinella spiralis]
Tsp_08924	14	0	2.89	0.01	-8.17493	4.30906e-05	0.000139763	-	-	-	gi|60544817|gb|AAX22751.1|/1.78794e-16/newborn larvae-specific DNase II-11 [Trichinella spiralis]
Tsp_06279	16	0	3.3	0.01	-8.36632	1.0284e-05	3.67387e-05	-	-	-	gi|60544809|gb|AAX22747.1|/9.08951e-19/newborn larvae-specific DNase II-7 [Trichinella spiralis]
Tsp_07569	23	0	4.74	0.01	-8.88874	6.82958e-08	3.11451e-07	-	-	-	gi|60544803|gb|AAX22744.1|/4.41747e-150/newborn larvae-specific DNase II-4 [Trichinella spiralis]
Tsp_12382	29	0	5.98	0.01	-9.224	9.28398e-10	4.90725e-09	-	-	-	gi|60544805|gb|AAX22745.1|/3.12823e-18/newborn larvae-specific DNase II-5 [Trichinella spiralis]
Tsp_00873	33	0	6.8	0.01	-9.40939	5.28804e-11	3.08796e-10	-	-	-	gi|117581955|gb|ABK41422.1|/2.72741e-52/DNase II [Trichinella spiralis]
Tsp_11494	34	0	7.01	0.01	-9.45327	2.58336e-11	1.53814e-10	-	-	-	gi|60544803|gb|AAX22744.1|/5.82342e-148/newborn larvae-specific DNase II-4 [Trichinella spiralis]
Tsp_12138	2173	3	448.05	0.59	-9.56873	0	0	-	-	-	gi|60544811|gb|AAX22748.1|/1.97879e-150/newborn larvae-specific DNase II-8 [Trichinella spiralis]
Tsp_11501	40	0	8.25	0.01	-9.68825	3.51176e-13	2.56635e-12	-	-	-	gi|60544807|gb|AAX22746.1|/2.94814e-122/newborn larvae-specific DNase II-6 [Trichinella spiralis]
Tsp_11488	42	0	8.66	0.01	-9.75822	8.3812e-14	6.89765e-13	-	-	GO:0009987//cellular process	gi|60544815|gb|AAX22750.1|/1.4449e-110/newborn larvae-specific DNase II-10 [Trichinella spiralis]
Tsp_07489	44	0	9.07	0.01	-9.82496	2.00026e-14	1.78825e-13	-	-	-	gi|60544805|gb|AAX22745.1|/3.37103e-10/newborn larvae-specific DNase II-5 [Trichinella spiralis]
Tsp_11496	46	0	9.48	0.01	-9.88874	4.77382e-15	4.48647e-14	-	-	-	gi|60544805|gb|AAX22745.1|/3.51955e-147/newborn larvae-specific DNase II-5 [Trichinella spiralis]
Tsp_12242	59	0	12.17	0.01	-10.2491	4.30962e-19	4.68525e-18	-	-	-	gi|60544813|gb|AAX22749.1|/2.10734e-18/newborn larvae-specific DNase II-9 [Trichinella spiralis]
Tsp_11495	65	0	13.4	0.01	-10.388	5.8584e-21	6.79698e-20	-	-	-	gi|60544817|gb|AAX22751.1|/1.5644e-102/newborn larvae-specific DNase II-11 [Trichinella spiralis]
Tsp_12135	184	0	37.94	0.01	-11.8895	5.56808e-58	1.151e-56	-	-	-	gi|60544805|gb|AAX22745.1|/4.93728e-149/newborn larvae-specific DNase II-5 [Trichinella spiralis]
Tsp_11489	190	0	39.18	0.01	-11.9359	7.56914e-60	1.59841e-58	-	-	-	gi|27549463|gb|AAO17050.1|/2.60829e-101/newborn larvae stage-specific DNase II [Trichinella spiralis]
Tsp_12346	396	0	81.65	0.01	-12.9952	6.17186e-124	1.84235e-122	-	-	-	gi|60544819|gb|AAX22752.1|/8.72949e-128/newborn larvae-specific DNase II-12 [Trichinella spiralis]
Tsp_11499	617	0	127.22	0.01	-13.635	1.08427e-192	3.86562e-191	-	-	-	gi|60544797|gb|AAX22741.1|/4.25683e-85/newborn larvae-specific DNase II-1 [Trichinella spiralis]
Tsp_12347	675	0	139.18	0.01	-13.7647	9.7896e-211	3.607e-209	-	-	-	gi|60544821|gb|AAX22753.1|/1.86941e-54/newborn larvae-specific DNase II-13 [Trichinella spiralis]
Tsp_12136	696	0	143.51	0.01	-13.8089	2.8672e-217	1.06534e-215	-	-	-	gi|60544821|gb|AAX22753.1|/8.55417e-67/newborn larvae-specific DNase II-13 [Trichinella spiralis]
Tsp_11502	947	0	195.26	0.01	-14.2531	2.33822e-295	9.71244e-294	-	-	-	gi|13242037|gb|AAK16519.1|AF331159_1/4.86095e-43/newborn larvae-specific protein SS1 [Trichinella spiralis]
Tsp_12139	1105	0	227.84	0.01	-14.4757	0	0	-	-	-	gi|60544821|gb|AAX22753.1|/3.26902e-122/newborn larvae-specific DNase II-13 [Trichinella spiralis]
Tsp_12134	3623	0	747.03	0.01	-16.1889	0	0	-	-	-	gi|60544815|gb|AAX22750.1|/6.28454e-49/newborn larvae-specific DNase II-10 [Trichinella spiralis]
Tsp_11476	44120	0	9097.13	0.01	-19.7951	0	0	-	-	-	gi|60544815|gb|AAX22750.1|/4.74939e-105/newborn larvae-specific DNase II-10 [Trichinella spiralis]
